# Supplementary material
Source: HighWire-hosted journal article supplement (http://www.ajnr.org/highwire/filestream/75529/field_highwire_adjunct_files/0/19-01281.pdf)
Supplement: 19-01281.pdf [file 19-01281.pdf]

**On-line Table: Diagnostic properties and hazard ratios for radiologic and clinical conversion to MS across time**

| Baseline Criteria/Outcome | Sensitivity (95% CI) | Specificity (95% CI) | PPV (95% CI)        | NPV (95% CI)        | Agreement (%) | HR (95% CI)         | P Value |
|---------------------------|----------------------|----------------------|---------------------|---------------------|---------------|---------------------|---------|
| <b>DIS + OCB</b>          |                      |                      |                     |                     |               |                     |         |
| DIS + DIT                 | 84.06 (73–26–91.76)  | 50.00 (28.22–71.78)  | 84.06 (77.42–89.02) | 50.00 (33.53–66.47) | 75.82         | 2.64 (1.38–5.06)    | <.01    |
| CDMS                      | 82.50 (67.22–92.66)  | 32.50 (18.57–49.13)  | 55.00 (48.56–61.27) | 65.00 (45.30–80.64) | 57.50         | 1.81 (0.80–4.12)    | .16     |
| <b>DIS + GAD</b>          |                      |                      |                     |                     |               |                     |         |
| DIS + DIT                 | 73.33 (61.86–82.89)  | 100 (85.75–100)      | 100 (–)             | 54.55 (45.19–63.59) | 79.80         | 38.92 (16.53–91.67) | <.001   |
| CDMS                      | 73.81 (57.96–86.14)  | 65.91 (50.08–79.51)  | 67.39 (56.89–76.40) | 72.50 (60.32–82.05) | 69.77         | 3.52 (1.77–7.02)    | <.001   |
| <b>DIS + IR</b>           |                      |                      |                     |                     |               |                     |         |
| DIS + DIT                 | 58.67 (46.70–69.92)  | 83.33 (62.62–95.26)  | 91.67 (81.51–96.49) | 39.22 (31.82–47.14) | 64.65         | 2.73 (1.70–4.37)    | <.001   |
| CDMS                      | 54.76 (38.67–70.15)  | 59.09 (43.25–73.66)  | 56.10 (44.92–66.69) | 57.78 (47.50–67.42) | 56.98         | 1.73 (0.94–3.18)    | .08     |
| <b>DIS + iron</b>         |                      |                      |                     |                     |               |                     |         |
| DIS + DIT                 | 66.67 (54.83–77.14)  | 79.17 (57.85–92.87)  | 90.91 (81.85–95.68) | 43.18 (34.19–52.64) | 69.70         | 2.76 (1.69–4.52)    | <.001   |
| CDMS                      | 64.29 (48.03–78.45)  | 59.09 (43.25–73.66)  | 60.00 (49.62–69.55) | 63.41 (51.89–71.92) | 61.63         | 2.21 (1.17–4.16)    | .014    |
| <b>DIS + 2 CVs</b>        |                      |                      |                     |                     |               |                     |         |
| DIS + DIT                 | 76.00 (65.75–85.11)  | 70.83 (48.91–87.38)  | 89.06 (81.17–93.90) | 48.57 (36.94–60.36) | 74.75         | 3.16 (1.83–5.44)    | <.001   |
| CDMS                      | 73.81 (57.96–86.14)  | 52.27 (36.69–67.54)  | 59.62 (50.79–67.86) | 67.65 (53.91–78.89) | 62.79         | 2.43 (1.21–4.87)    | .013    |
| <b>DIS + any</b>          |                      |                      |                     |                     |               |                     |         |
| DIS + DIT                 | 94.67 (86.90–98.53)  | 50.00 (29.12–70.88)  | 85.54 (79.80–89.86) | 75.00 (51.61–89.40) | 83.84         | 7.45 (2.70–20.58)   | <.001   |
| CDMS                      | 95.24 (83.84–99.42)  | 29.55 (16.76–45.20)  | 56.34 (51.30–61.25) | 86.67 (60.93–96.44) | 61.63         | 5.86 (1.42–24.43)   | .015    |

**Note:**—HR indicates hazard ratio; GAD, gadolinium [Gadovist; Bayer]; CI, confidence intervals; PPV, positive predictive values; NPV, negative predictive values; DIS, dissemination in space; OCBs, oligoclonal bands; IR, iron rim; CVs, central veins; DIT, dissemination in time; CDMS, clinically definite multiple sclerosis; (–), Gadobutrol [Gadovist; Bayer].  
**Bold text denotes Baseline Criteria.**
